# Supplementary material for: Longitudinal fluorescence in situ hybridization reveals cytogenetic evolution in myeloma relapsing after autologous transplantation
Source: PubMed Central journal article supplement — Haematologica. 2017 May 11;102(8):1432–8. doi: 10.3324/haematol.2017.168005 (PMC5541876; doi:10.3324/haematol.2017.168005), 2017-08
Supplement: HAEMATOL-2017-168005v5-Merz-01.pdf [file HAEMATOL-2017-168005v5-Merz-01.pdf]

## Repeated genetic testing is necessary in relapsed myeloma since the risk profile might be worse after treatment compared to baseline, especially in the era of novel agents

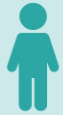

128

Multiple myeloma patients with paired bone marrow samples

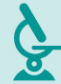

Retrospective analysis of fluorescence *in situ* hybridization results

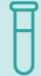

vs

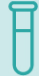

diagnosis

relapse

Cytogenetic evolution investigation

- IgH translocations (t(4;14); t(11;14); t(14;16))  
Hyperdiploid karyotypes → No significant changes between primary diagnosis and relapse
- IgH translocations with unknown partners → More frequent at relapse
- High-risk cytogenetic abnormalities (deletion 17p and/or gain1q21) → More frequent at relapse

→ Associated with dismal outcome regardless whether were present at diagnosis or developed at relapse only

→ Developed more frequently by patients with relapse after novel agent-based induction compared to those being treated with conventional chemotherapy
